# Supplementary material for: Human and Murine Clonal CD8+ T Cell Expansions Arise during Tuberculosis Because of TCR Selection
Source: PLOS journal article supplement (doi:10.1371/journal.ppat.1004849), 2015-05-06
Supplement: S5 (10.1371/journal.ppat.1004849.s005) [file journal.ppat.1004849.s005]

## Supplemental Data 5: Infection of Va2var mice with Mtb

A.

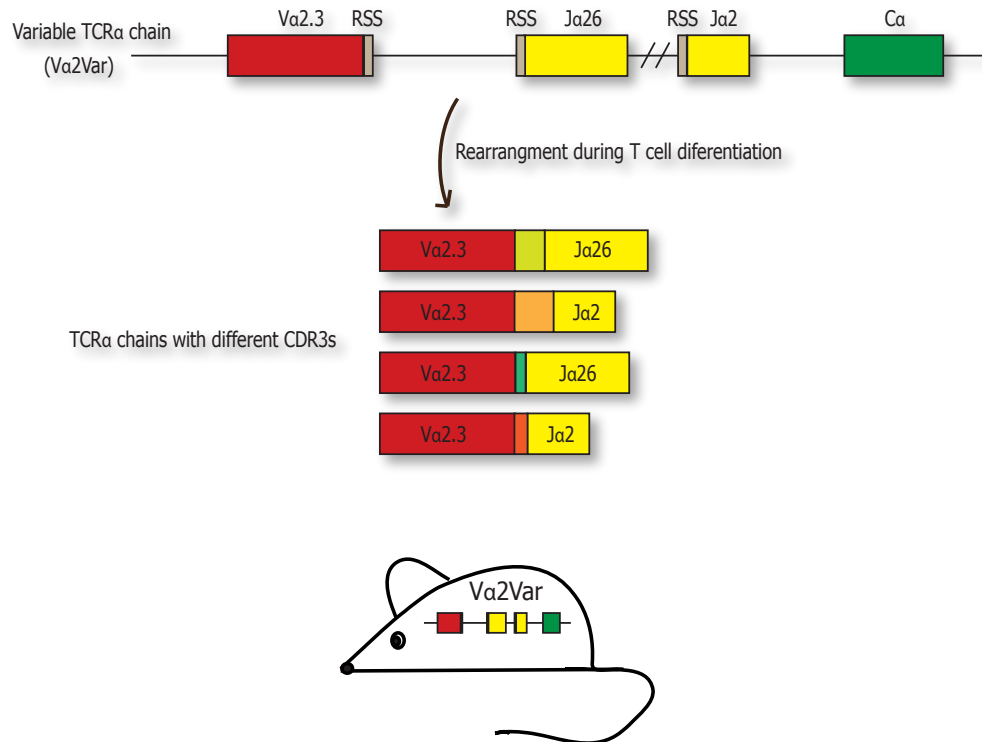

B.

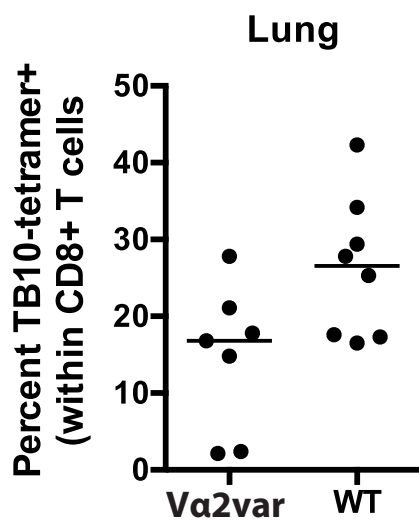

C.

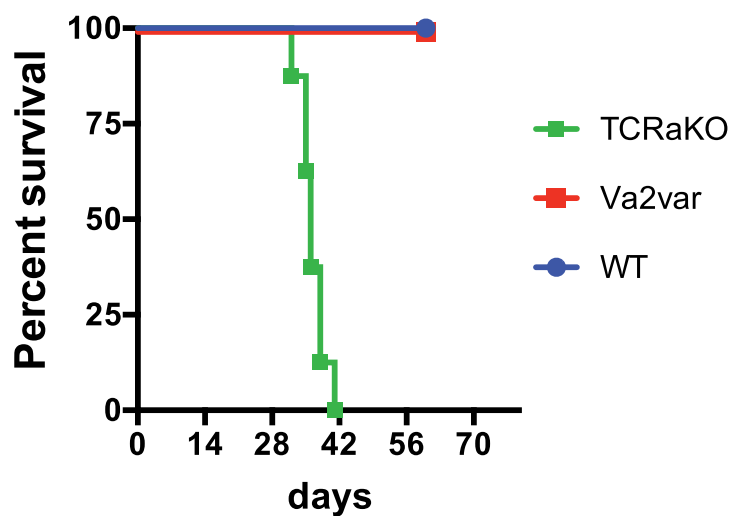

A. Schematic of the Va2var locus of Va2var mice.

B. The TB10.4<sub>4-11</sub>-specific CD8+ T cell response following Mtb infection of WT vs. Va2var mice.

C. Survival of C57BL/6, Va2var, or TCRa knockout mice after low dose aerosolized Mtb.
