# Supplementary material for: Human and Murine Clonal CD8+ T Cell Expansions Arise during Tuberculosis Because of TCR Selection
Source: PLOS journal article supplement (doi:10.1371/journal.ppat.1004849), 2015-05-06
Supplement: S6 (10.1371/journal.ppat.1004849.s006) [file journal.ppat.1004849.s006]

## Supplemental Data 6: Frequency of arginine and aspartic acid in naïve cells

| Results are averaged from the TCR repertoire from 3 B6 spleens |         |         |            |
|----------------------------------------------------------------|---------|---------|------------|
| Number of unique sequences                                     | 53,499  | 53,499  | 53,499     |
| Query                                                          | "R" @ 6 | "D" @ 7 | "RD" @ 6-7 |
| Number of positive results                                     | 5,381   | 4,025   | 1,320      |
| Percentage of unique sequences with "positive" result          | 10.1%   | 7.5%    | 2.5%       |

To determine whether the enrichment of "R" or "D" was significant, we compared their occurrence in the normal TCR $\beta$  repertoire. We queried the splenic TCR $\beta$  repertoire from three C57BL/6 mice representing over 1.1 million reads and ~53,000 unique sequences each. The average frequency of "R", "D", or "RD" at CDR3 $\beta$  position 6, 7, or 6-7, was 10.1%, 7.5%, and 2.5% respectively, indicating "R," "D," and "RD," were significantly enriched in the clonally expanded TB10.4<sub>4-11</sub>-specific CD8<sup>+</sup> T cells. Testing using the Chi-square with Yates' correction shows that the frequency of R, D, or RD in the clonally expanded sequences is significantly increased in the four cloned sequences compared to the normal splenic repertoire of B6 mice ( $P < 0.0001$ ).
